# Supplementary material for: Prospects of Genomic Prediction in the USDA Soybean Germplasm Collection: Historical Data Creates Robust Models for Enhancing Selection of Accessions
Source: PubMed Central journal article supplement (PMC4978888; doi:10.1534/g3.116.031443), 2016-05-31
Supplement: supp_g3.116.031443_FigureS1.pdf [file supp_g3.116.031443_FigureS1.pdf]

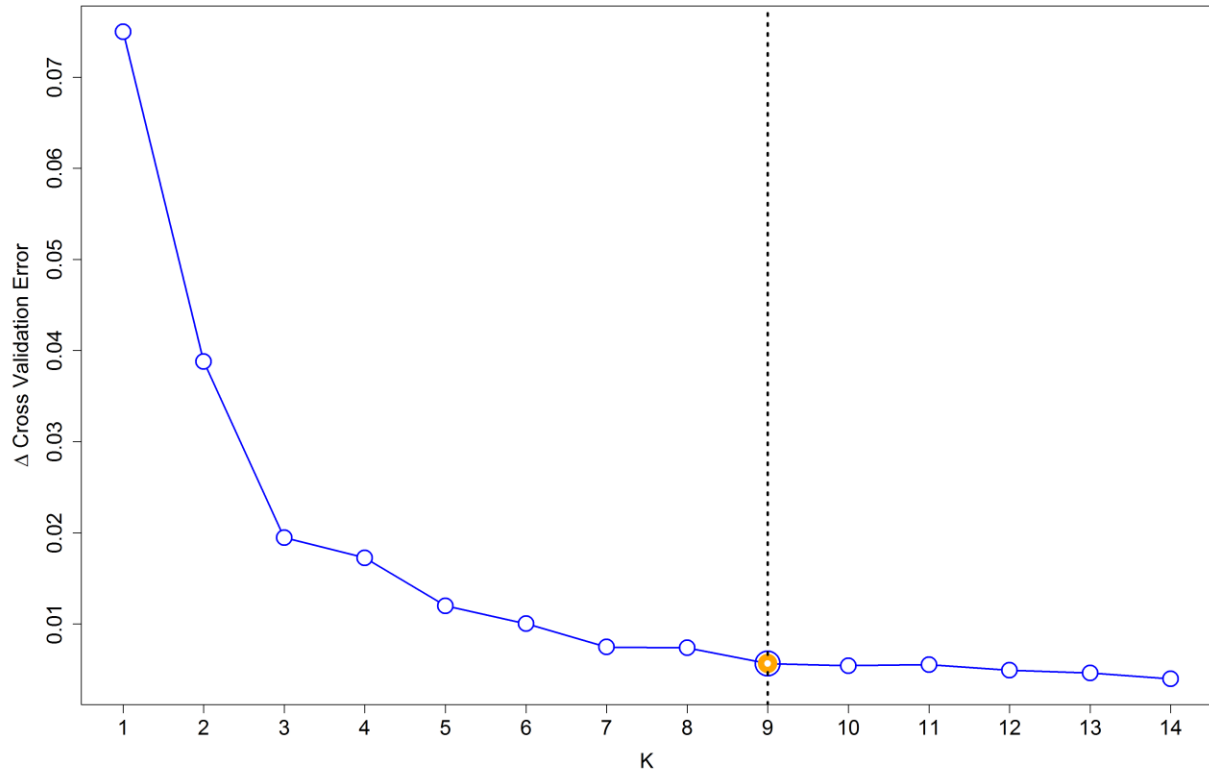

Figure S1. Exploration of the optimal number of genetic subpopulations (K) within the set of soybean accessions included in this study. A difference in cross-validation error between levels of K was used as a criteria. A plateau in  $\Delta$  cross-validation error at K=9 was used to infer K.
